# Supplementary material for: El arte naif: pintura de tigua
Source: Hindawi journal article supplement (doi:10.1155/2015/171845), 2010-01-01
Supplement: f1 [file 171845.f1.zip]

# Supplement data

Table1. Association between EGFR overexpression and other variables in HCC tissues.

| Variables                    | EGFR overexpression <sup>†</sup> |            | p <sup>*</sup> |
|------------------------------|----------------------------------|------------|----------------|
|                              | Negative                         | Positive   |                |
| <b>Tissues</b>               |                                  |            |                |
| Matched non-cancerous (n=35) | 25 (71.4%)                       | 10 (28.6%) | 0.713          |
| HCC (n=40)                   | 27 (67.5%)                       | 13 (32.5%) |                |
| <b>Age (Years)</b>           |                                  |            |                |
| <50                          | 11 (57.9%)                       | 8 (42.1%)  | 0.217          |
| ≥50                          | 16 (76.2%)                       | 5 (23.8%)  |                |
| <b>Sex</b>                   |                                  |            |                |
| Male                         | 22 (62.9%)                       | 13 (37.1%) | 0.154          |
| Female                       | 5 (100%)                         | 0 (0%)     |                |
| <b>Tumor size</b>            |                                  |            |                |
| <5 cm                        | 8 (61.5%)                        | 5 (38.5%)  | 0.576          |
| ≥5 cm                        | 19 (70.4%)                       | 8 (29.6%)  |                |
| <b>AFP</b>                   |                                  |            |                |
| <500 ng/ml                   | 17 (70.8%)                       | 7 (29.2%)  | 0.391          |
| ≥500 ng/ml                   | 8 (57.1%)                        | 6 (42.9%)  |                |
| <b>HBsAg</b>                 |                                  |            |                |
| Negative                     | 7 (63.6%)                        | 4 (36.4%)  | 0.748          |
| Positive                     | 20 (69%)                         | 9 (36.4%)  |                |
| <b>TP53 expression</b>       |                                  |            |                |
| Negative                     | 14(70%)                          | 6 (30%)    | 0.736          |
| Positive                     | 13(65%)                          | 7 (35%)    |                |
| <b>Ki-67</b>                 |                                  |            |                |
| Negative (<10%)              | 6 (66.7%)                        | 3 (33.3%)  | 0.894          |
| Mildly positive (10-19%)     | 6 (75.0%)                        | 2 (25.0%)  |                |
| Moderately positive (20-29%) | 6 (54.5%)                        | 5 (45.5%)  |                |
| Strongly positive (>30%)     | 9 (75.0%)                        | 3 (25.0%)  |                |

<sup>†</sup> EGFR overexpression defined as negative (0 and 1+) and positive ( 2+ and 3+),\* chi-square ( $\chi^2$ ) test

Table 2. Association between EGFR mutation and other variables in HCC tissues.

| Variables                    | Missense mutation |           | <i>p</i> * | Silent mutation |           | <i>p</i> * |
|------------------------------|-------------------|-----------|------------|-----------------|-----------|------------|
|                              | Negative          | Positive  |            | Negative        | Positive  |            |
| <b>Age (Years)</b>           |                   |           |            |                 |           |            |
| <50                          | 10 (76.9%)        | 3 (23.1%) |            | 6 (46.2%)       | 7 (53.8%) |            |
| ≥50                          | 13 (65.0%)        | 7 (35.0%) | 0.466      | 15 (75.0%)      | 5 (25.0%) | 0.092      |
| <b>Sex</b>                   |                   |           |            |                 |           |            |
| Male                         | 19 (70.4%)        | 8 (29.6%) |            | 17 (63.0%)      | 10 (37%)  |            |
| Female                       | 4 (66.7%)         | 2 (33.3%) | 1.00       | 4 (66.7%)       | 2 (33.3%) | 1.00       |
| <b>Tumor size</b>            |                   |           |            |                 |           |            |
| <5 cm                        | 10 (76.9%)        | 3 (23.1)  |            | 7 (53.8%)       | 6 (46.2%) |            |
| ≥5 cm                        | 13 (65.0%)        | 7 (35.0%) | 0.466      | 14 (70%)        | 6 (30%)   | 0.346      |
| <b>AFP</b>                   |                   |           |            |                 |           |            |
| <500 ng/ml                   | 15 (68.2%)        | 7 (31.8%) |            | 13 (59.1%)      | 9 (40.9%) |            |
| ≥500 ng/ml                   | 7 (70.0%)         | 3 (30.0%) | 0.918      | 7 (70%)         | 3 (30%)   | 0.555      |
| <b>HBsAg</b>                 |                   |           |            |                 |           |            |
| Negative                     | 16 (76.2%)        | 5 (23.8%) |            | 13 (61.9%)      | 8 (38.1%) |            |
| Positive                     | 7 (63.6%)         | 4 (36.4%) | 0.453      | 7 (63.6%)       | 4 (36.4%) | 0.923      |
| <b>TP53 expression</b>       |                   |           |            |                 |           |            |
| Negative                     | 12 (70.6%)        | 5 (29.4%) |            | 8 (47.1%)       | 9 (52.9%) |            |
| Positive                     | 8 (66.7%)         | 4 (33.3%) | 0.822      | 9 (75.0%)       | 3 (25.0%) | 0.132      |
| <b>Ki-67</b>                 |                   |           |            |                 |           |            |
| Negative (<10%)              | 5 (62.5%)         | 3 (37.5%) |            | 4 (50.0%)       | 4 (50.0%) |            |
| Mildly positive (10-19%)     | 4 (80.0%)         | 1 (20.0%) |            | 4(80.0%)        | 1 (20.0%) |            |
| Moderately positive (20-29%) | 6 (85.7%)         | 1 (14.3%) |            | 4(57.1%)        | 3 (42.9%) |            |
| Strongly positive (>30%)     | 5 (55.6%)         | 4 (44.4%) | 0.810      | 5(55.6%)        | 4 (44.4%) | 0.991      |
| <b>EGFR overexpression</b>   |                   |           |            |                 |           |            |
| Negative (score 0, 1+)       | 13 (68.4%)        | 6 (31.6%) |            | 13(68.4%)       | 6 (31.6%) |            |
| Positive (score 2+, 3+)      | 6 (66.7%)         | 3 (33.3%) | 0.926      | 3(33.3%)        | 6 (66.7%) | 0.080      |

\* chi-square ( $\chi^2$ ) test
