# Supplementary material for: Missense Mutations in Exons 18–24 of EGFR in Hepatocellular Carcinoma Tissues
Source: Biomed Res Int. 2015 Sep 7;2015:171845. doi: 10.1155/2015/171845 (PMC4575985; doi:10.1155/2015/171845)
Supplement: Supplementary file 1 — Table 1. Association between EGFR overexpression and other variables in HCC tissues. Table 2. Association between EGFR mutation and other variables in HCC tissues. Electropherograms of the 13 missense mutations in EGFR exons 19–23 detected in hepatocellular carcinoma tissues. Electropherograms of the 11 silent mutations in EGFR exons 19–23 detected in hepatocellular carcinoma tissues. [file 171845.f1.zip]

Archive with 4 entries (3 files):
- 171845.f1/
- 171845.f1/mat.171845.v2.pdf
- 171845.f1/Missence mutations in HCC for supplement data BMRI.pptx
- 171845.f1/Silent mutations in HCC for supplement data BMRI.pptx
